# Supplementary material for: Deracemization of 1-phenylethanols in a one-pot process combining Mn-driven oxidation with enzymatic reduction utilizing a compartmentalization technique
Source: Royal Society of Chemistry journal article supplement (doi:10.1039/d2ra01326f), 2022-01-01
Supplement: d2ra01326f1.pdf [file d2ra01326f1.pdf]

## Electronic Supplementary information (ESI) for

### **Deracemization of 1-Phenylethanols in a One-pot Process Combined Mn-driven Oxidation with Enzymatic Reduction Utilizing Compartmentalization Technique**

Hirofumi Sato<sup>1\*</sup>; Rei Yamada<sup>2</sup>; Yomi Watanabe<sup>1</sup>; Takaaki Kiryu<sup>1</sup>; Shintaro Kawano<sup>1</sup>;  
Motohiro Shizuma<sup>1</sup>; Hideya Kawasaki<sup>2</sup>

<sup>1</sup>Osaka Research Institute of Industrial Science and Technology, 1-6-50 Morinomiya, Joto-ku, Osaka  
536-8553, Japan

<sup>2</sup>Kansai University, 3-3-35, Yamatecho, Suita, Osaka 564-8680, Japan

#### **List of contents**

1. General procedure for the 1-phenylethanol substrate scope
2. General procedure for the synthesis of racemic 1-phenylethanols *rac*-1
3. NMR spectra and chiral HPLC charts of chiral phenylethanols  
*Rac*-1-(2-chlorophenyl)ethanol  
*Rac*-1-(3-chlorophenyl)ethanol  
*Rac*-1-(4-chlorophenyl)ethanol  
*Rac*-1-(2-methylphenyl)ethanol  
*Rac*-1-(3-methylphenyl)ethanol  
*Rac*-1-(4-methylphenyl)ethanol
4. Figures  
**Figure S1** The effect of Mn oxidizer on the enzyme activity.  
**Figure S2** Mn isolation in the interior of PDMS thimble  
**Figure S3** <sup>1</sup>H-NMR chart of Mn oxidation product.  
**Figure S4** <sup>1</sup>H-NMR chart of expected byproducts
5. HPLC Charts of products shown in Table 5 (the main manuscript)  
2-Cl (**1b**)  
3-Cl (**1c**)  
4-Cl (**1d**)

2-Me (**1e**)

3-Me (**1f**)

4-Me (**1g**)

## 1. General procedure for the 1-phenylethanol substrate scope

Magnetic stirrer bar was placed in a PDMS thimble, and then the PDMS thimble was placed in a round-bottomed flask. Dichloromethane solution of substituted *rac*-1-phenylethanol (***rac*-1**, 1.00 mmol in 4.0 mL) was added into the inside of PDMS thimble, and then Mn oxidant was also added to the inside of the PDMS thimble. The mixture was stirred for 24 hours at 25 °C. After the completion of the oxidation, *i*-PrOH (15 mL), phosphate buffer solution (15 mL, 50 mM, pH 7.0), and another magnetic stirrer bar were added to the exterior of the PDMS thimble. Then, NADP<sup>+</sup> (15 mg, 20 μmol) and ADH from *Lactobacillus kefir* (LK-ADH, 500 U/mmol, 1400 U/mL) were added to the exterior and the reaction mixture was stirred for 24 hours at 25 °C. After the reaction, the PDMS thimble was removed from the flask, and then the aqueous phase in the flask was subsequently extracted with chloroform (10 mL × 3), the combined extracts were dried over sodium sulfate and concentrated in vacuum. To quantify and qualify the product in the interior the removed PDMS thimble with Mn oxidant debris was also washed with chloroform, and then filtered. The filtrate was concentrated in vacuum. The resulting products both from the interior and the exterior were quantified by <sup>1</sup>H-NMR with *t*-BuOH as an internal standard. The enantiomeric excess was evaluated by chiral HPLC.

## 2. General procedure for the synthesis of racemic 1-phenylethanols *rac*-1

The corresponding acetophenone (5 mmol) was dissolved in 10 mL of methanol. Subsequently, sodium borohydride (7.53 mmol) was added at 0 °C and the solution was stirred over night at room temperature. After completion of the reaction, 10 mL of saturated ammonium chloride solution was added to the mixture. The desired compound was extracted with methylene chloride (3 x 10 mL) and the organic layer was evaporated to concentrate. The residue was purified by silica gel column chromatography to obtain the desired racemic (substituted) 1-phenylethanol.



$^{13}\text{C}$  NMR

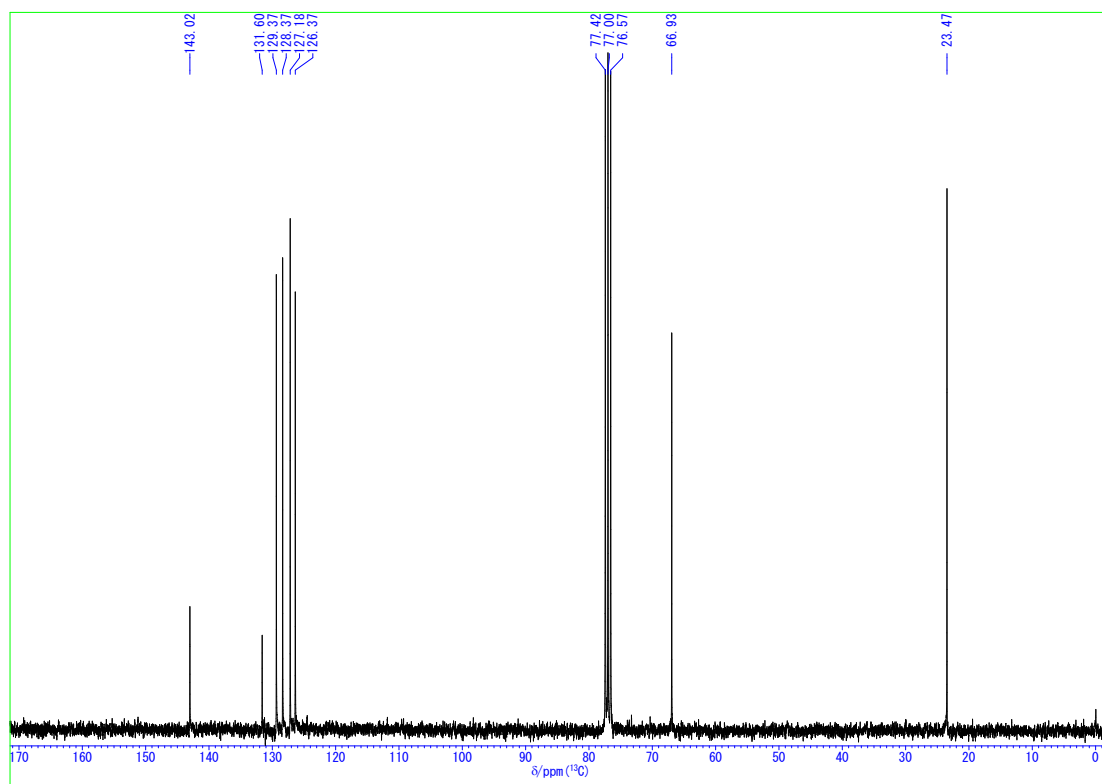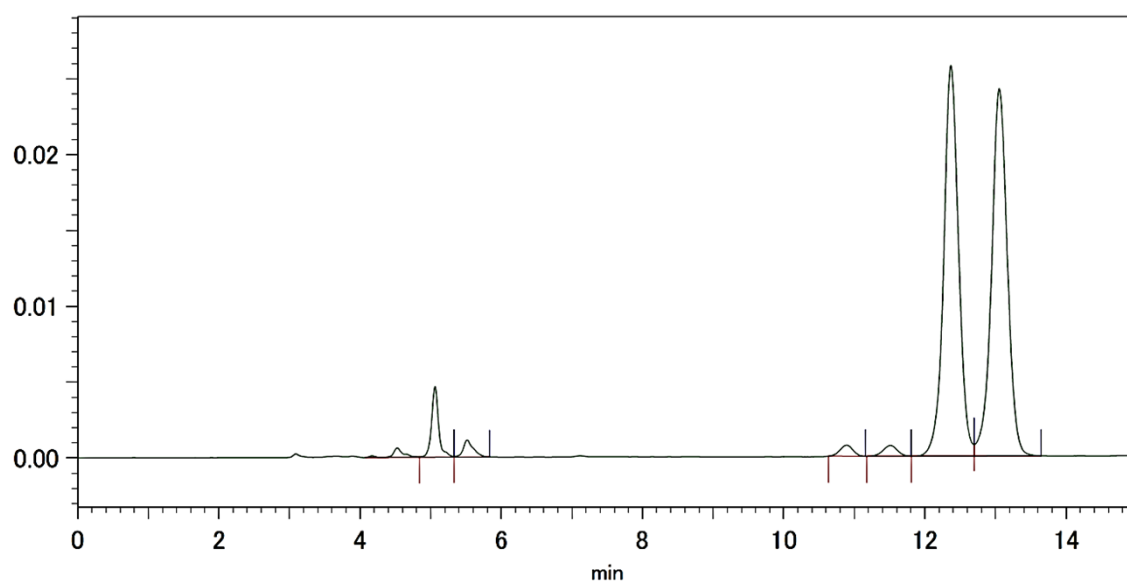

HPLC (YMC CHIRAL Cellulose-C 250 x 4.6 mm I.D. S-5  $\mu\text{m}$ , 1.5% IPA/hexane, flow 1.0 mL/min, 254 nm, 40  $^{\circ}\text{C}$ ):  $t_{\text{R(S)}}$  12.4 min,  $t_{\text{R(R)}}$  13.1 min.

### ***Rac*-1-(3-chlorophenyl)ethanol**

According to the general procedure, 3-chloroacetophenone was used to yield the product *rac*-1-(3-chlorophenyl)ethanol as colorless oil (626 mg, 4.0 mmol, 80%).

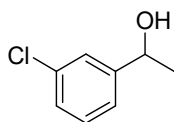

Chemical Formula: C<sub>8</sub>H<sub>9</sub>ClO

Molecular Weight: 156.61

<sup>1</sup>H NMR

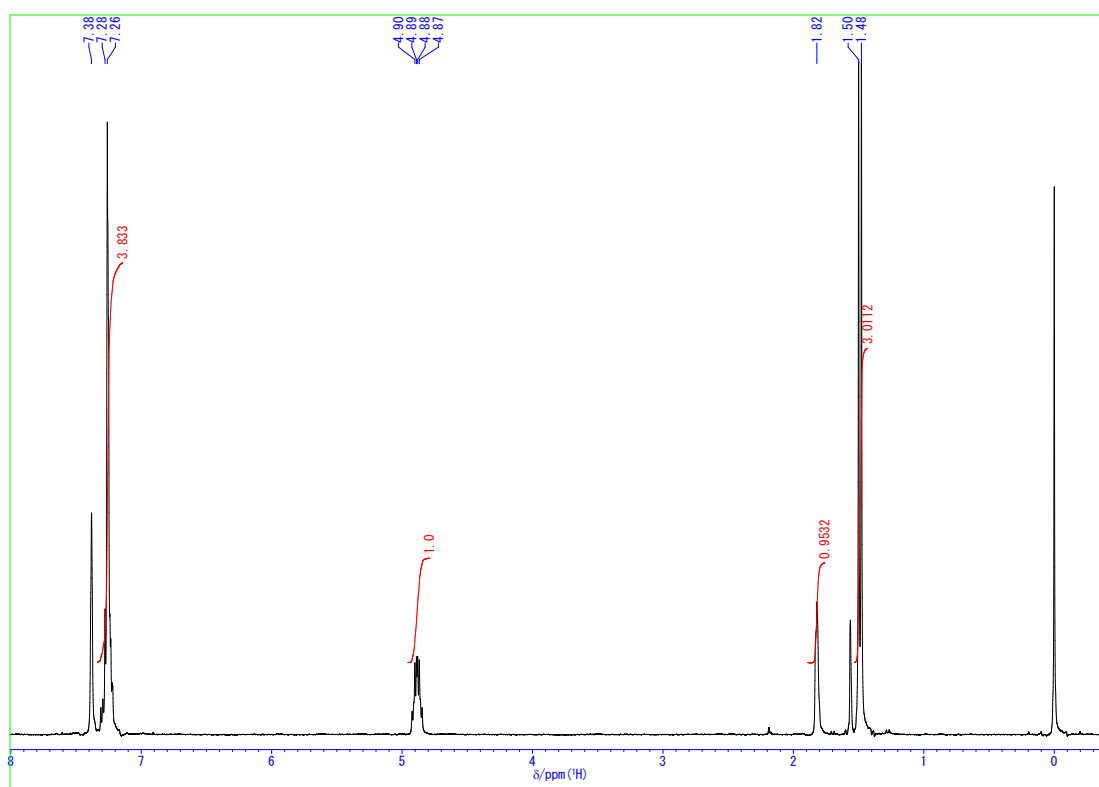

$^{13}\text{C}$  NMR

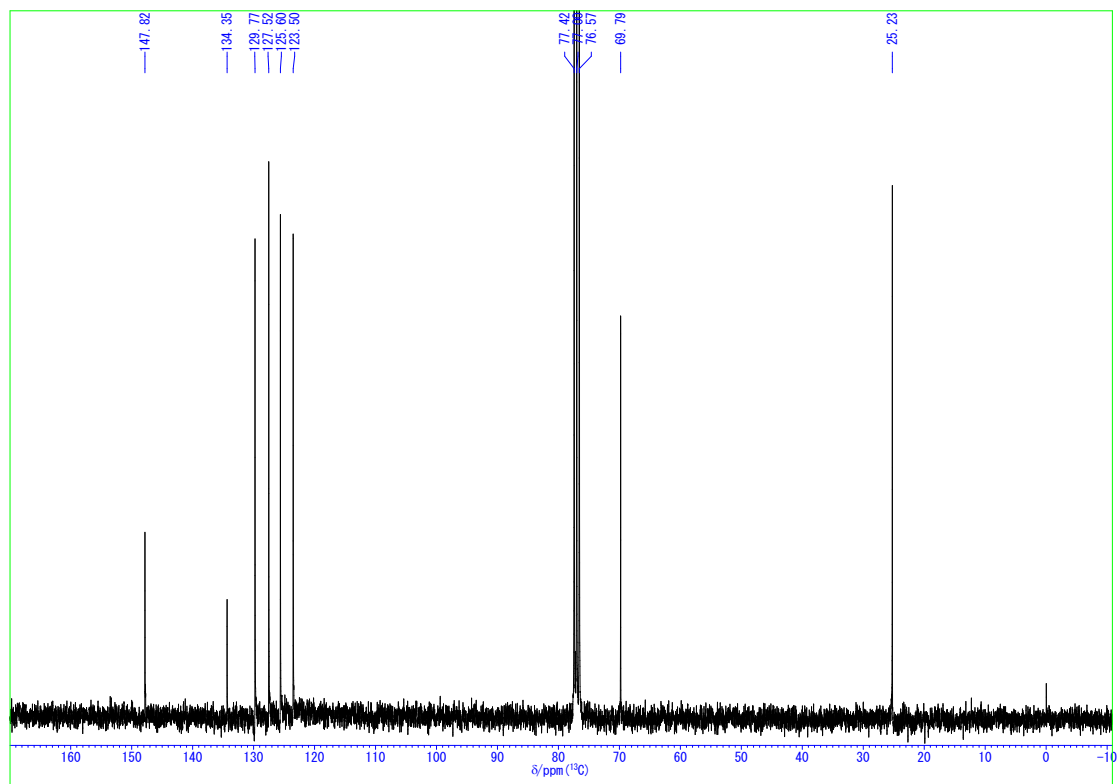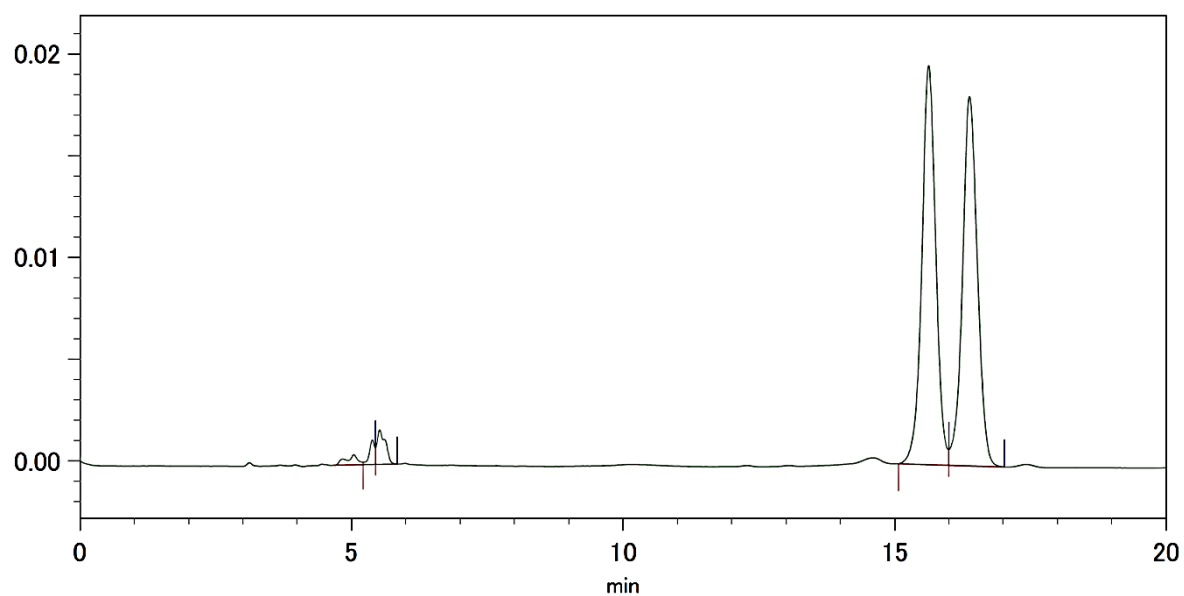

HPLC (YMC CHIRAL Cellulose-C 250 x 4.6 mm I.D. S-5  $\mu\text{m}$ , 1.5% IPA/hexane, flow 1.0 mL/min, 254 nm, 40  $^{\circ}\text{C}$ ):  $t_{R(S)}$  15.6 min,  $t_{R(R)}$  16.4 min.

### ***Rac*-1-(4-chlorophenyl)ethanol**

According to the general procedure, 4-chloroacetophenone was used to yield the product *rac*-1-(4-chlorophenyl)ethanol as colorless oil (665 mg, 4.2 mmol, 85%).

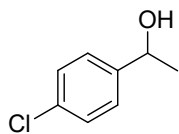

Chemical Formula: C<sub>8</sub>H<sub>9</sub>ClO

Molecular Weight: 156.61

<sup>1</sup>H NMR

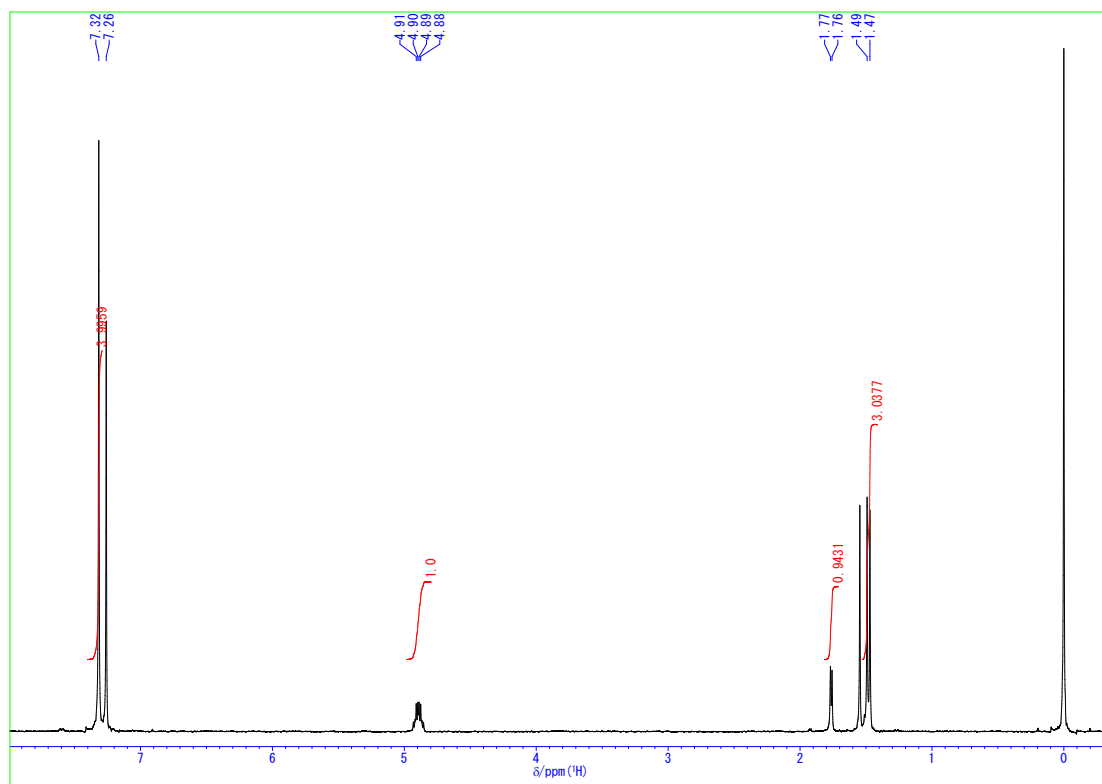



$^{13}\text{C}$  NMR

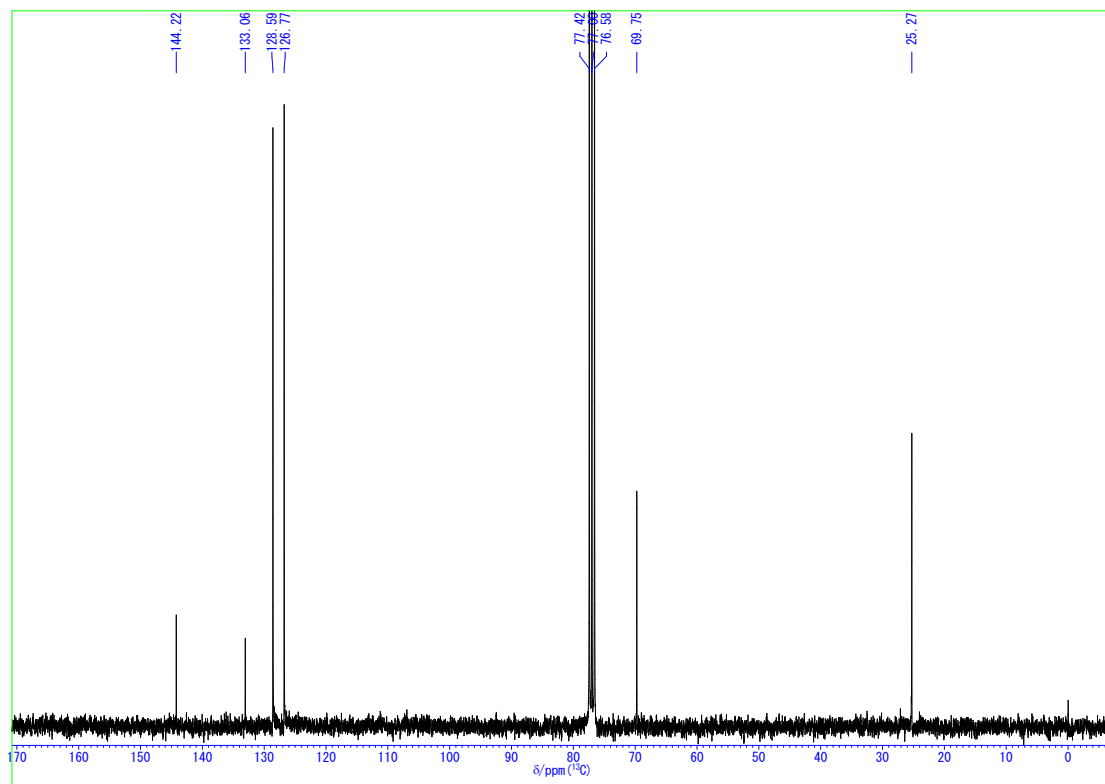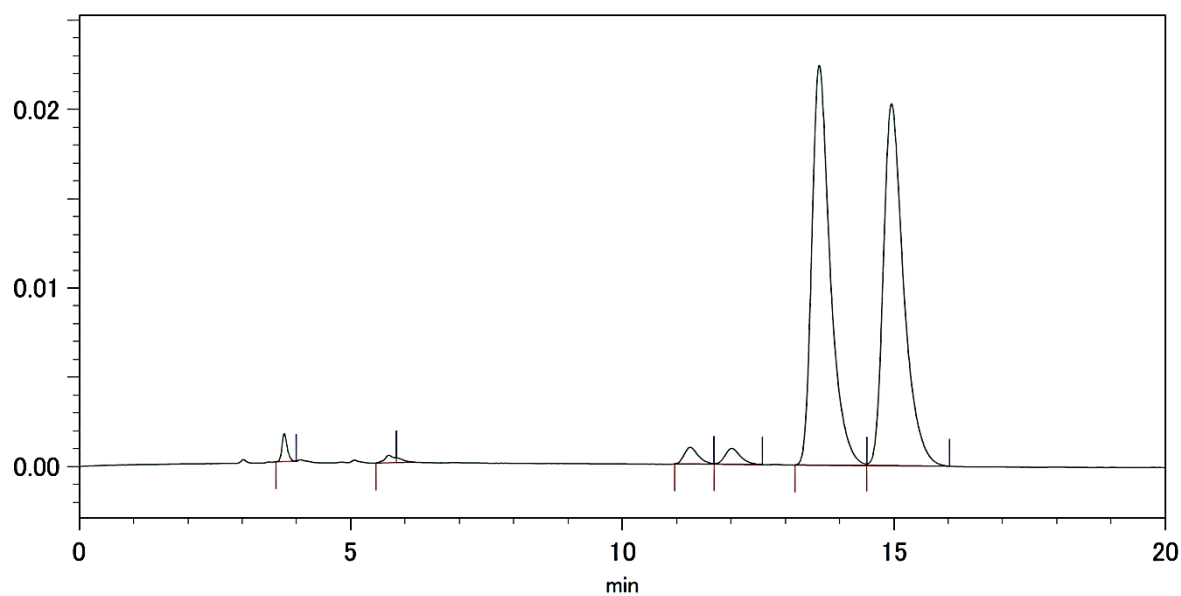

HPLC (DAICEL CHEMICAL IND., LTD. CHIRALCEL OD 250 x 4.6 mmI.D. S-10  $\mu\text{m}$ , 2%IPA/hexane, flow 1.0 mL/min, 254 nm, 40  $^{\circ}\text{C}$ ):  $t_{\text{R(S)}}$  13.6 min,  $t_{\text{R(R)}}$  14.9 min.

### ***Rac*-1-(2-methylphenyl)ethanol**

According to the general procedure, 2-methylacetophenone was used to yield the product *rac*-1-(2-methylphenyl)ethanol as colorless oil (538 mg, 3.9 mmol, 79%).

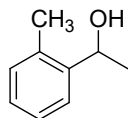

Chemical Formula: C<sub>9</sub>H<sub>12</sub>O

Molecular Weight: 136.19

### <sup>1</sup>H NMR

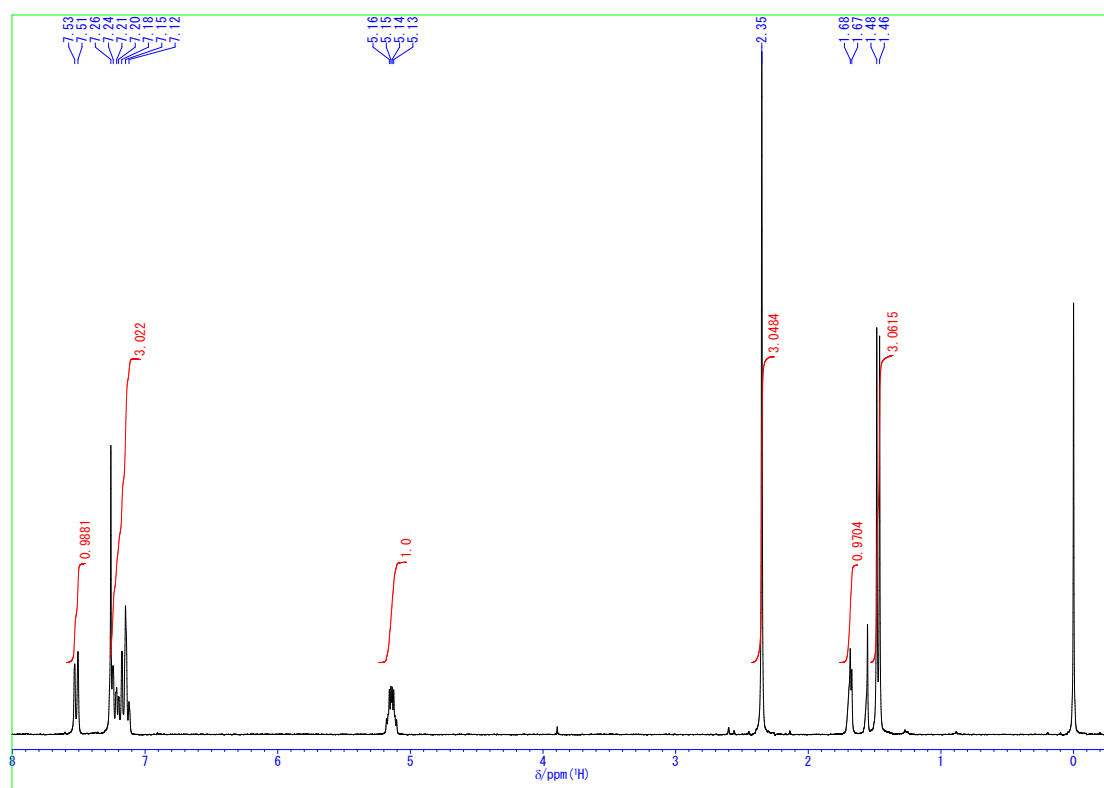

$^{13}\text{C}$  NMR

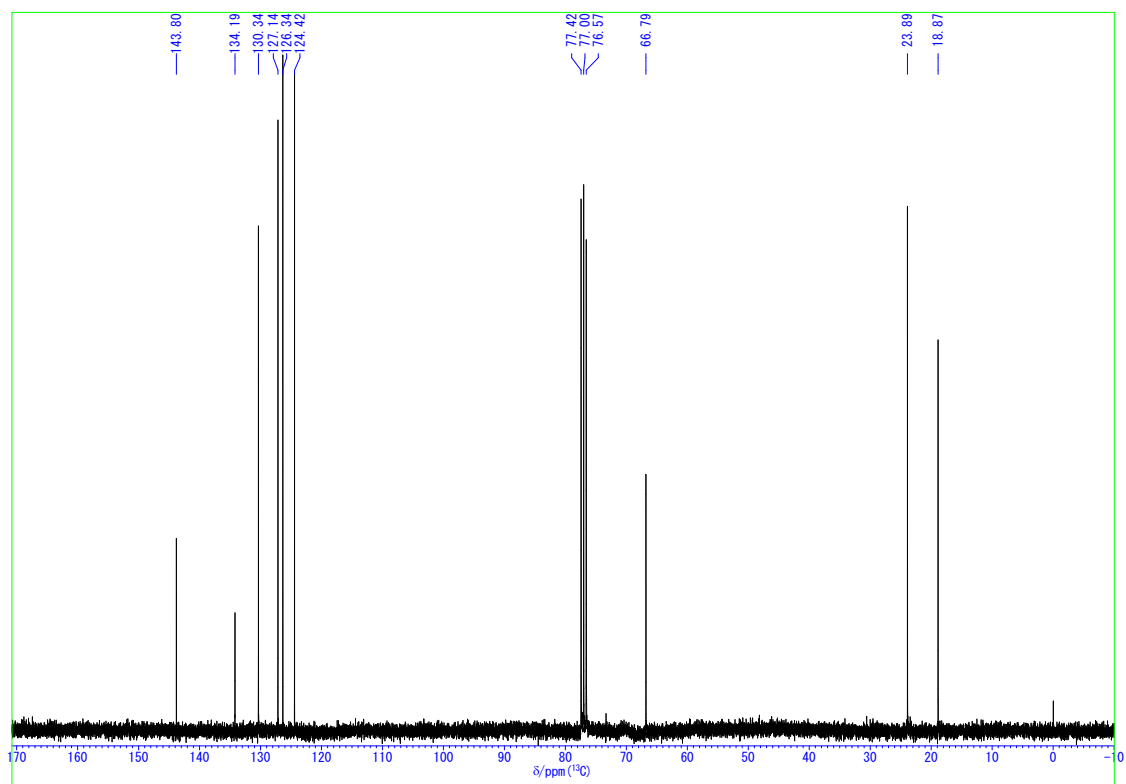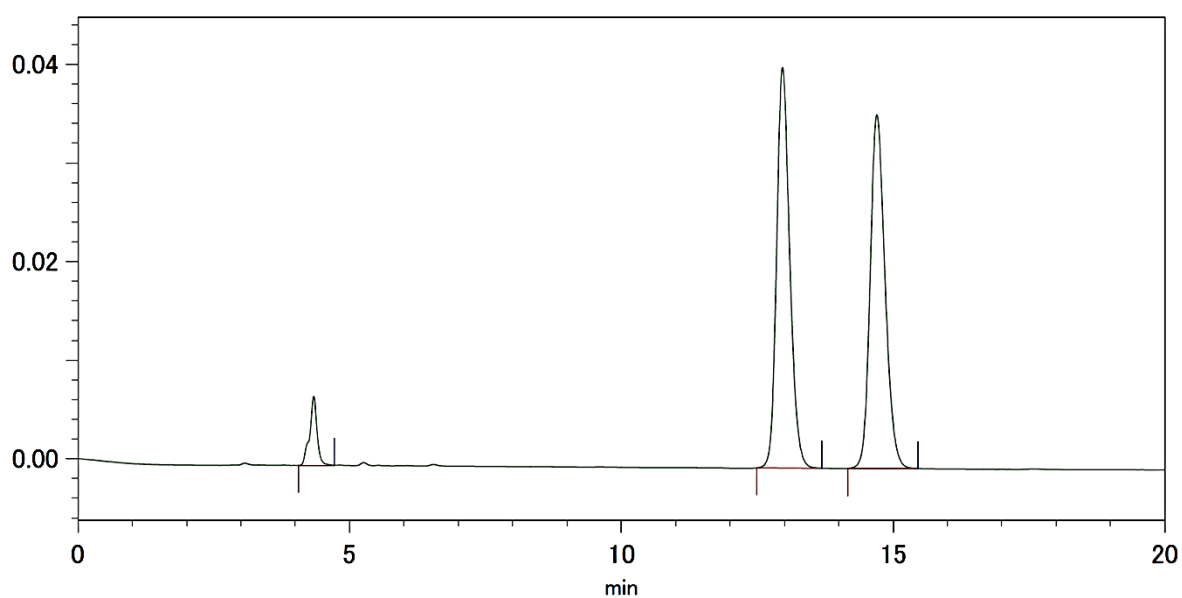

HPLC (YMC CHIRAL Amylose-C 250 x 4.6 mm I.D. S-5  $\mu\text{m}$ , 1.5% IPA/hexane, flow 1.0 mL/min, 254 nm, 40  $^{\circ}\text{C}$ ):  $t_{R(S)}$  12.9 min,  $t_{R(R)}$  14.7 min.

### ***Rac*-1-(3-methylphenyl)ethanol**

According to the general procedure, 3-methylacetophenone was used to yield the product *rac*-1-(3-methylphenyl)ethanol as colorless oil (538 mg, 3.9 mmol, 79%).

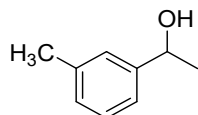

Chemical Formula: C<sub>9</sub>H<sub>12</sub>O

Molecular Weight: 136.19

<sup>1</sup>H NMR

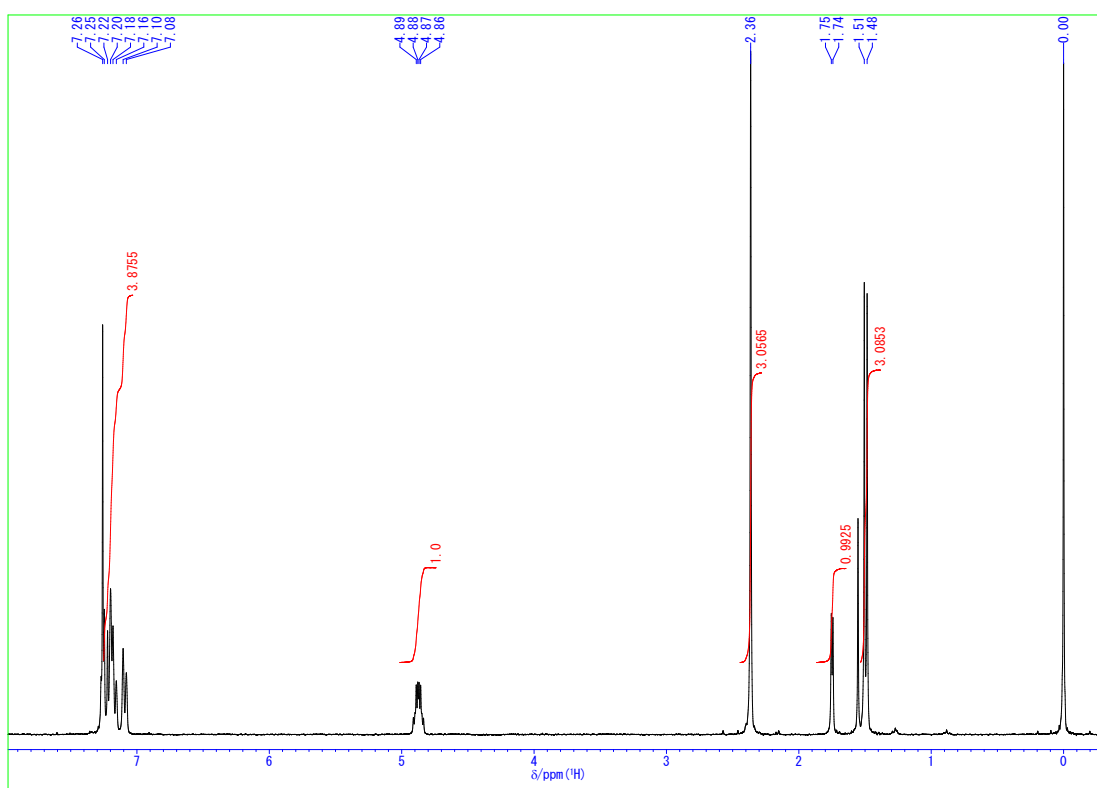

$^{13}\text{C}$  NMR

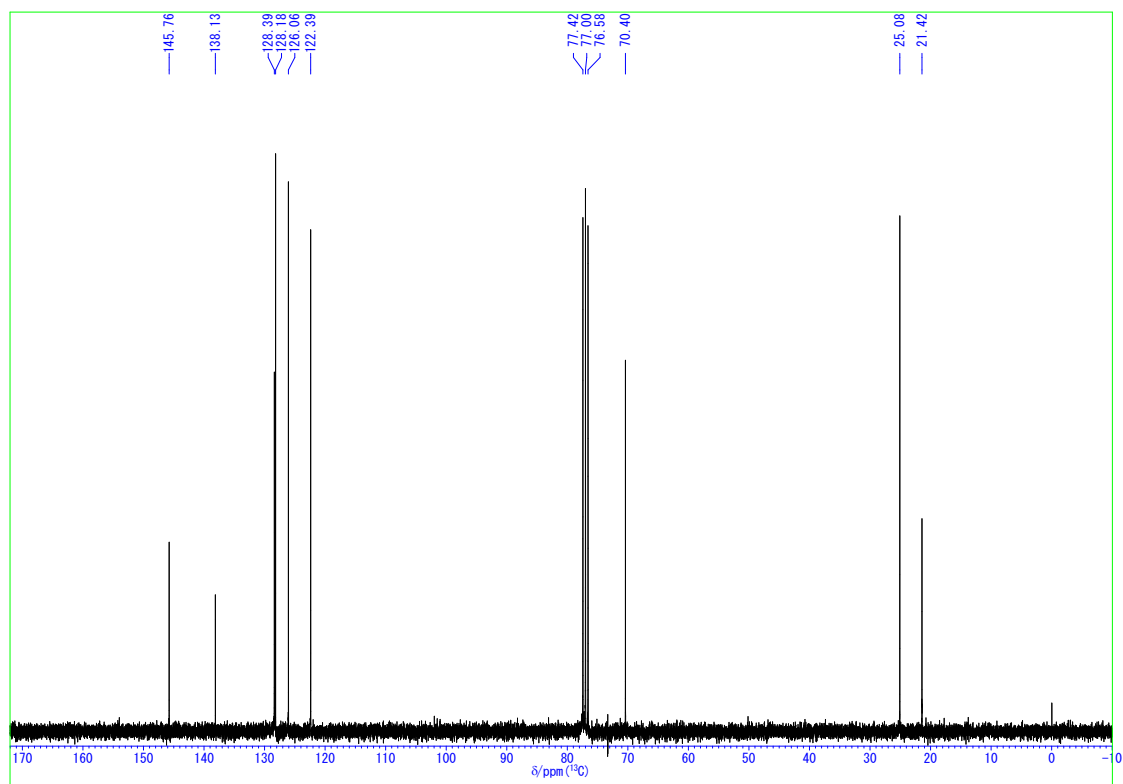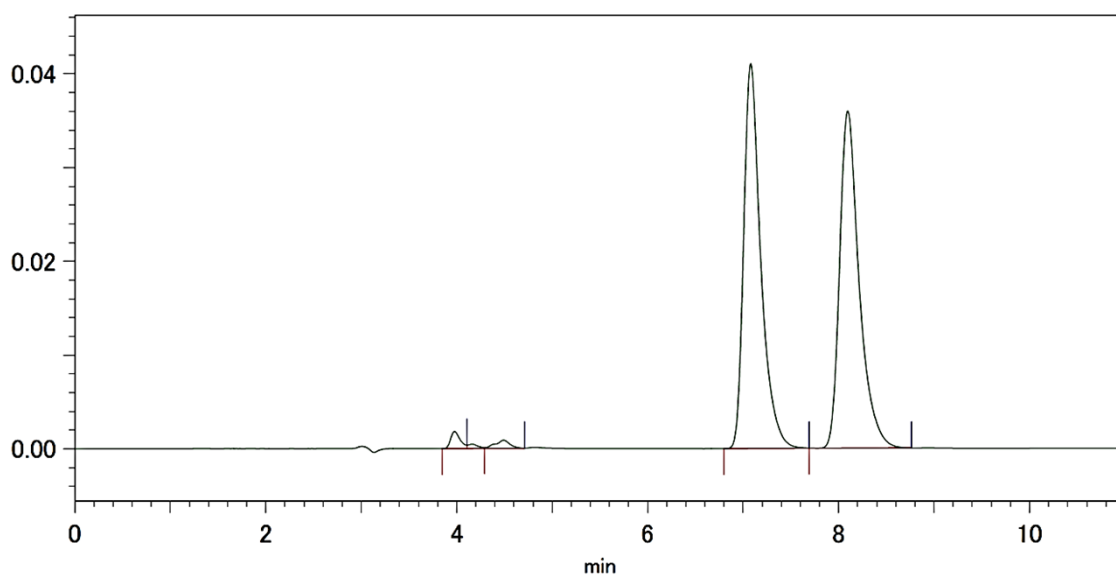

HPLC (DAICEL CHEMICAL IND., LTD. CHIRALCEL OD 250 x 4.6 mmI.D. S-10  $\mu\text{m}$ , 5%IPA/hexane, flow 1.0 mL/min, 254 nm, 40  $^{\circ}\text{C}$ ):  $t_{R(S)}$  7.1 min,  $t_{R(R)}$  8.1 min.

### ***Rac*-1-(4-methylphenyl)ethanol**

According to the general procedure, 3-methylacetophenone was used to yield the product *rac*-1-(3-methylphenyl)ethanol as colorless oil (538 mg, 3.9 mmol, 79%).

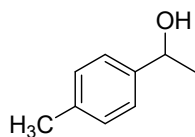

Chemical Formula: C<sub>9</sub>H<sub>12</sub>O

Molecular Weight: 136.19

<sup>1</sup>H NMR

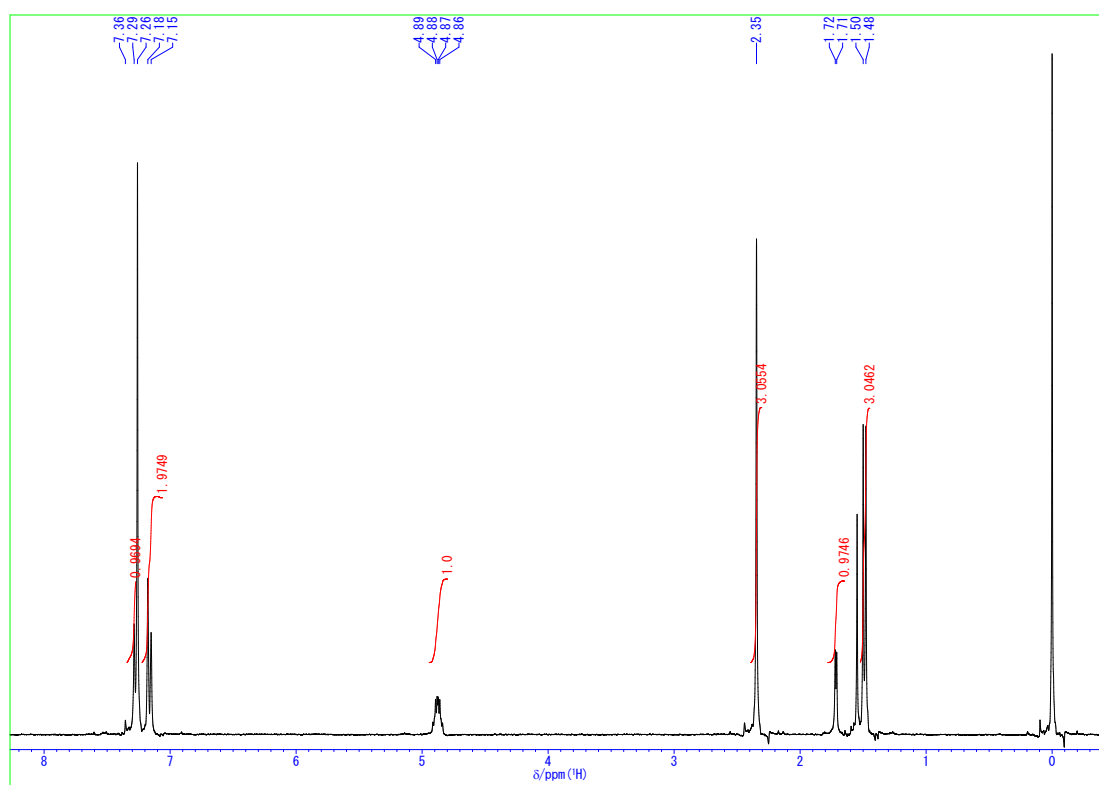

$^{13}\text{C}$  NMR

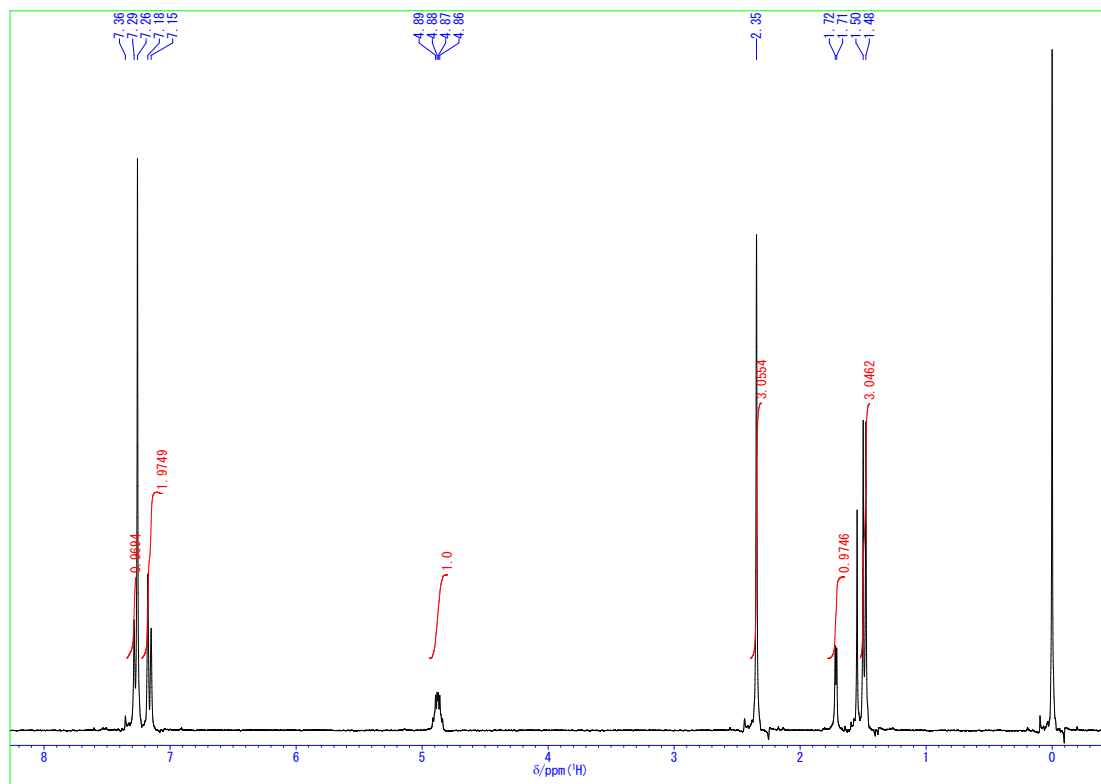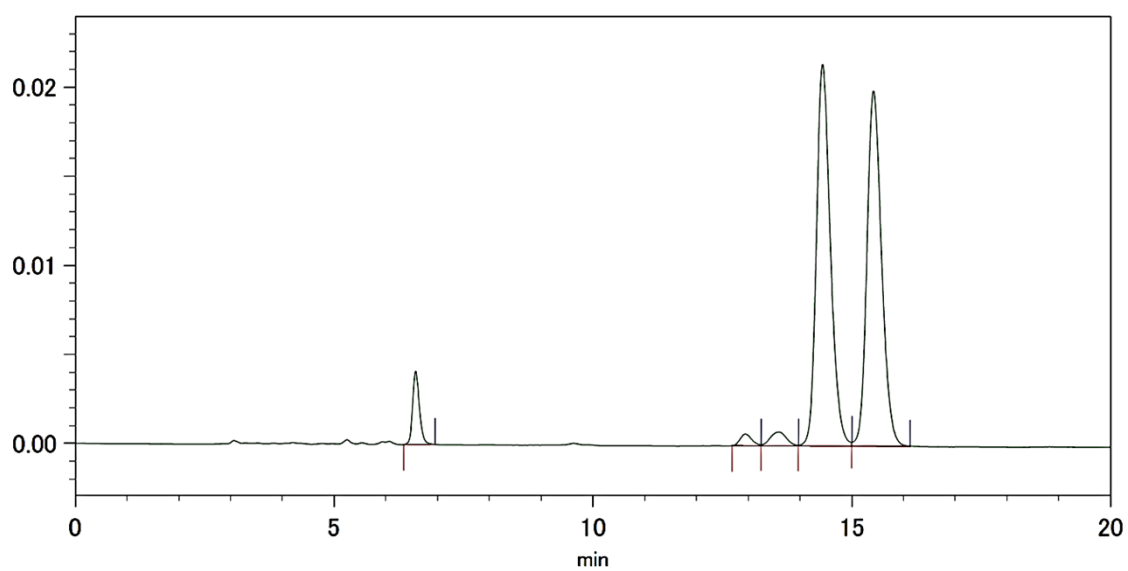

HPLC (YMC CHIRAL Amylose-C 250 x 4.6 mmI.D. S-5  $\mu\text{m}$ , 5%IPA/hexane, flow 1.0 mL/min, 254 nm, 40  $^{\circ}\text{C}$ ):  $t_{\text{R(S)}}$  14.2 min,  $t_{\text{R(R)}}$  15.2 min.

#### 4. Figures

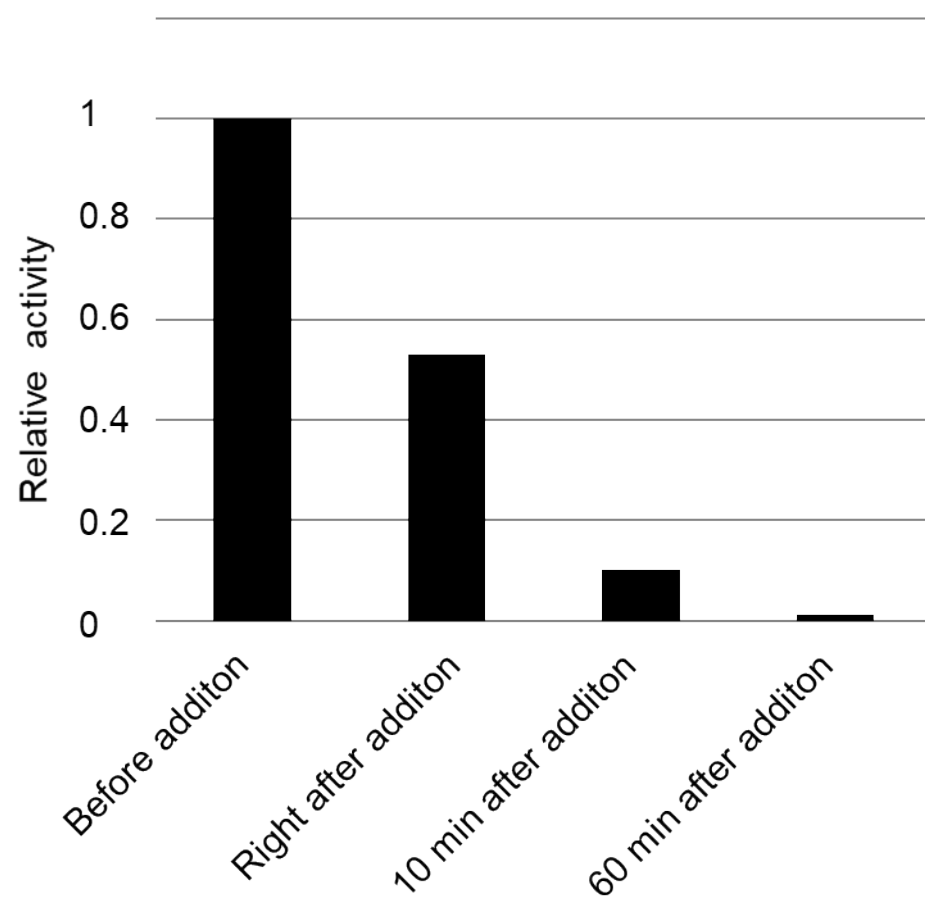

**Figure S1** The effect of Mn oxidizer on the enzyme activity.



#### 4-1. Barrier property of PDMS thimble

To prevent the deactivation of exterior enzyme by Mn-oxide, the permeability of Mn species through PDMS thimble was evaluated by monitoring Mn species in exterior chamber. Suspension of Mn oxidant in DCM was poured into the interior of PDMS thimble, and the exterior was filled with IPA/water. After 24 hours, the concentration of Mn species in the exterior was evaluated by ICP-AES. The detected concentration was below 100 ppb at any amount of Mn oxidant from 0.5 g to 3 g (Figure S2); there was no correlation between the added and the detected level. Mn species were turned out to be perfectly isolated by PDMS membrane as the same extent was detected from the blank sample.

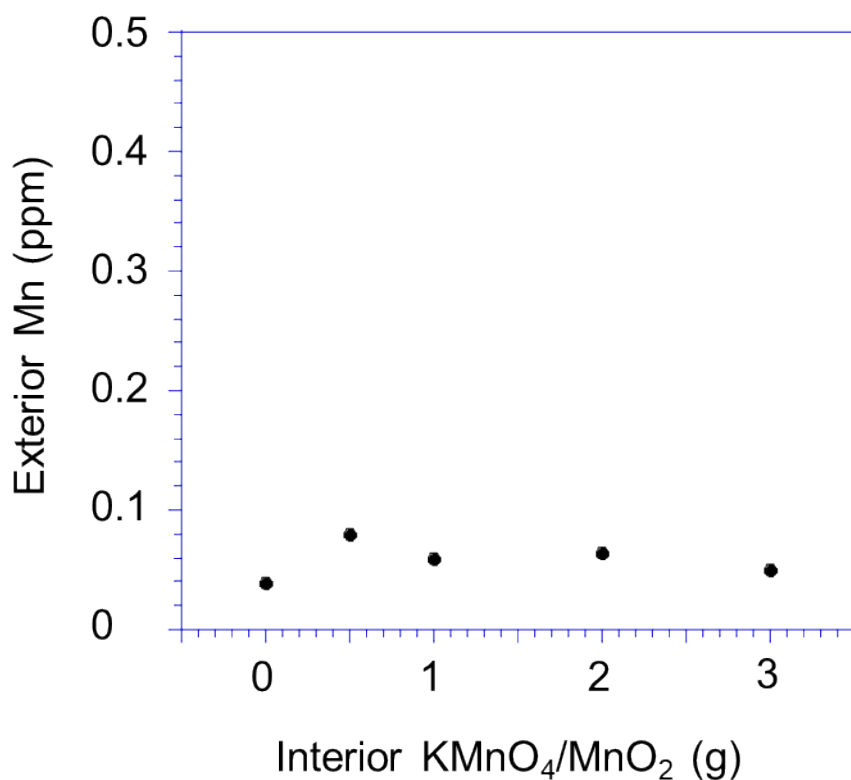

**Figure S2** Mn isolation in the interior of PDMS thimble.

#### 4-2 Detailed Mn oxidant preparation and the oxidation product

KMnO<sub>4</sub> and MnO<sub>2</sub> (1/3 w/w, for example 0.5 g and 1.5 g, respectively) was ground with agate mortar for up to 5 min until they became powder. The mortar was placed in an oven and dried at 210 °C for 24 hours. After cool in desiccator, the Mn oxidant was used for the oxidation.

Racemic 1-phenylethanol was oxidized, and the product was evaluated by <sup>1</sup>H-NMR. In the reaction, only acetophenone was formed and no aldehydes or carboxylic acids (8-12 ppm) were observed (Figure S3). NMR chart of the expected byproducts (products of Wacker oxidation) is shown in Figure S4 as a reference.

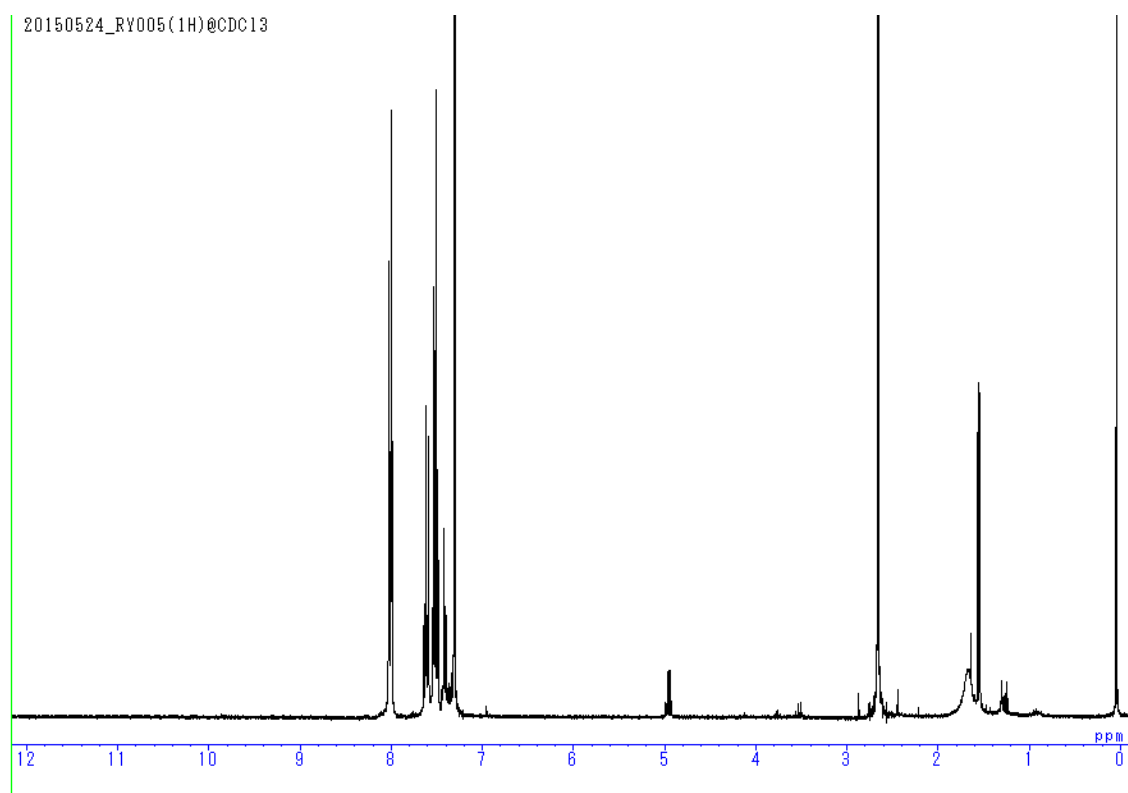

**Figure S3** <sup>1</sup>H NMR chart of Mn oxidation product.

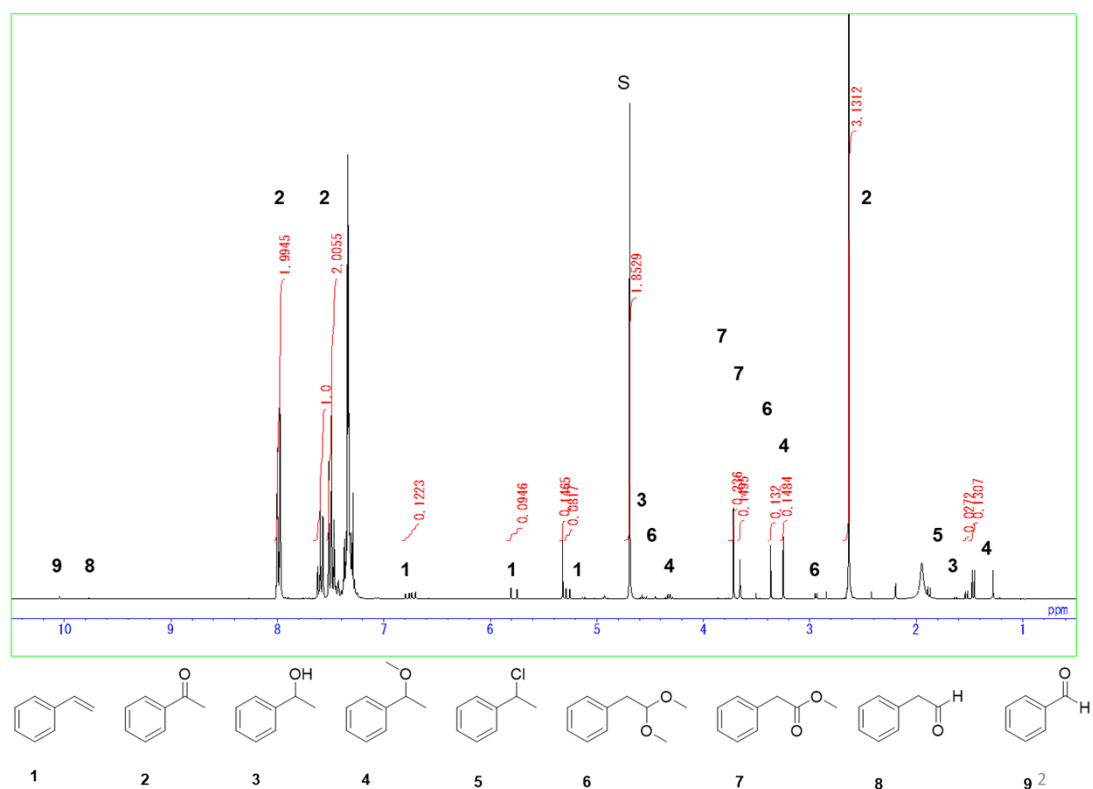

**Figure S4**  $^1\text{H}$  NMR chart of expected byproducts.

## 5. HPLC Charts of products shown in Table 5 (main manuscript)

### 2-Cl (1b)

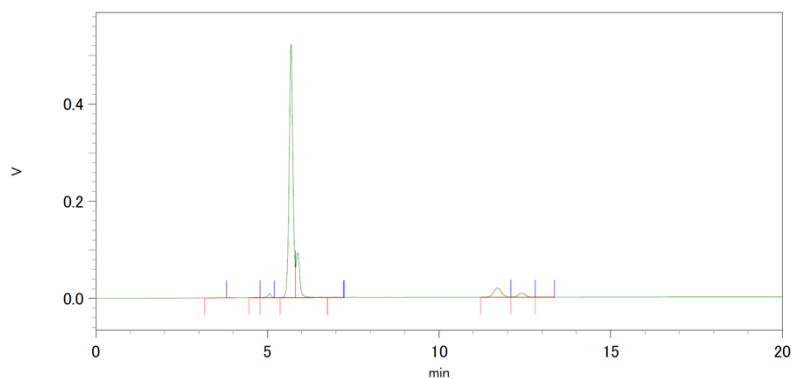

Detector A (254 nm)

| Retention time (min) | Area    | Area% | Height | Height% |
|----------------------|---------|-------|--------|---------|
| 3.583                | 8979    | 0.17  | 328    | 0.05    |
| 4.662                | 5796    | 0.11  | 765    | 0.12    |
| 5.052                | 56820   | 1.09  | 8104   | 1.24    |
| 5.681                | 4003094 | 76.89 | 521740 | 80.09   |
| 5.877                | 687805  | 13.21 | 91769  | 14.09   |
| 6.979                | 5203    | 0.10  | 574    | 0.09    |
| 11.689               | 306750  | 5.89  | 19101  | 2.93    |
| 12.409               | 126978  | 2.44  | 8703   | 1.34    |
| 13.092               | 5032    | 0.10  | 327    | 0.05    |

HPLC (YMC CHIRAL Cellulose-C 250 x 4.6 mmI.D. S-5  $\mu$ m, 1.5%IPA/hexane, flow 1.0 mL/min, 254 nm, 40 °C):  $t_{R(S)}$  12.4 min,  $t_{R(R)}$  13.1 min.

### 3-Cl (1c)

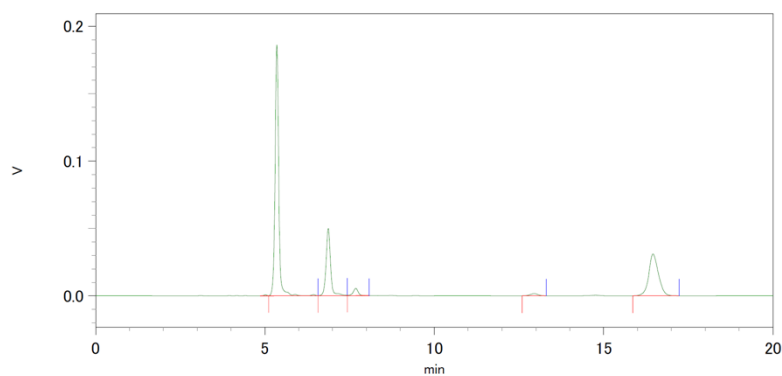

Detector A (254 nm)

| Retention time (min) | Area    | Area% | Height | Height% |
|----------------------|---------|-------|--------|---------|
| 5.347                | 1384309 | 54.51 | 186137 | 67.89   |
| 6.865                | 457024  | 18.00 | 49930  | 18.21   |
| 7.677                | 56081   | 2.21  | 5455   | 1.99    |
| 12.943               | 25755   | 1.01  | 1607   | 0.59    |
| 16.452               | 616294  | 24.27 | 31062  | 11.33   |

HPLC (YMC CHIRAL Cellulose-C 250 x 4.6 mmI.D. S-5  $\mu$ m, 1.5%IPA/hexane, flow 1.0 mL/min, 254 nm, 40 °C):  $t_{R(S)}$  15.6 min,  $t_{R(R)}$  16.4 min.

### 4-Cl (1d)

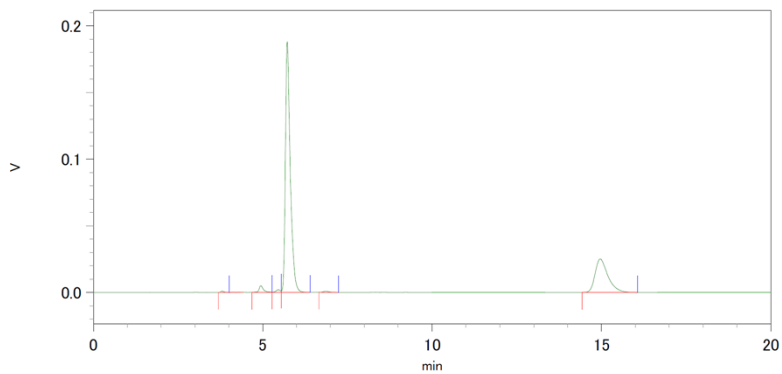

Detector A (254 nm)

| Retention time (min) | Area    | Area% | Height | Height% |
|----------------------|---------|-------|--------|---------|
| 3.798                | 7139    | 0.27  | 1091   | 0.49    |
| 4.939                | 44648   | 1.71  | 4966   | 2.24    |
| 5.452                | 17405   | 0.67  | 2008   | 0.90    |
| 5.719                | 1875298 | 71.67 | 188043 | 84.66   |
| 6.854                | 10628   | 0.41  | 927    | 0.42    |
| 14.959               | 661341  | 25.28 | 25090  | 11.30   |

HPLC (DAICEL CHEMICAL IND., LTD. CHIRALCEL OD 250 x 4.6 mmI.D. S-10  $\mu$ m, 2%IPA/hexane, flow 1.0 mL/min, 254 nm, 40 °C):  $t_{R(S)}$  13.6 min,  $t_{R(R)}$  14.9 min.

### 2-Me (1e)

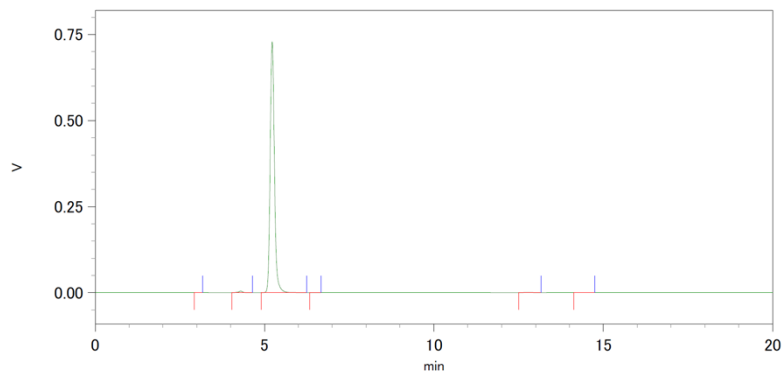

Detector A (254 nm)

| Retention time (min) | Area    | Area% | Height | Height% |
|----------------------|---------|-------|--------|---------|
| 3.040                | 1181    | 0.02  | 215    | 0.03    |
| 4.292                | 38561   | 0.60  | 4392   | 0.60    |
| 5.221                | 6368173 | 99.17 | 728893 | 99.24   |
| 6.461                | 1215    | 0.02  | 150    | 0.02    |
| 12.772               | 11493   | 0.18  | 743    | 0.10    |
| 14.350               | 915     | 0.01  | 54     | 0.01    |

HPLC (YMC CHIRAL Amylose-C 250 x 4.6 mm I.D. S-5  $\mu$ m, 1.5%IPA/hexane, flow 1.0 mL/min, 254 nm, 40 °C):  $t_{R(S)}$  12.9 min,  $t_{R(R)}$  14.7 min.

### 3-Me (1f)

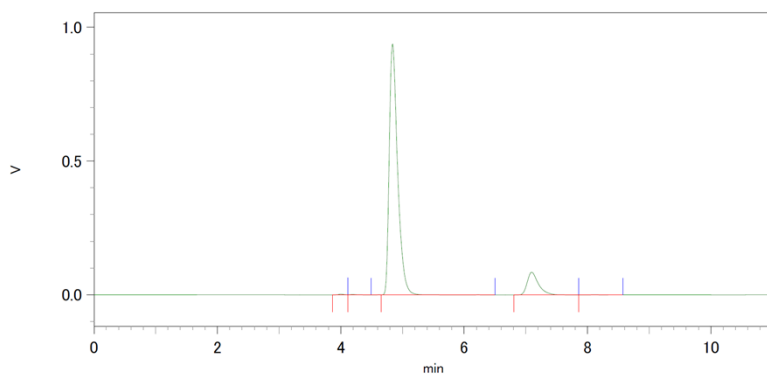

Detector A (254 nm)

| Retention time (min) | Area    | Area% | Height | Height% |
|----------------------|---------|-------|--------|---------|
| 3.996                | 17930   | 0.18  | 2623   | 0.26    |
| 4.193                | 14301   | 0.14  | 1724   | 0.17    |
| 4.835                | 8829184 | 88.76 | 938353 | 91.27   |
| 7.091                | 1078225 | 10.84 | 84894  | 8.26    |
| 8.111                | 7907    | 0.08  | 468    | 0.05    |

HPLC (YMC CHIRAL Amylose-C 250 x 4.6 mm I.D. S-5  $\mu$ m, 5%IPA/hexane, flow 1.0 mL/min, 254 nm, 40 °C):  $t_{R(S)}$  7.1 min,  $t_{R(R)}$  8.1 min.

#### 4-Me (1g)

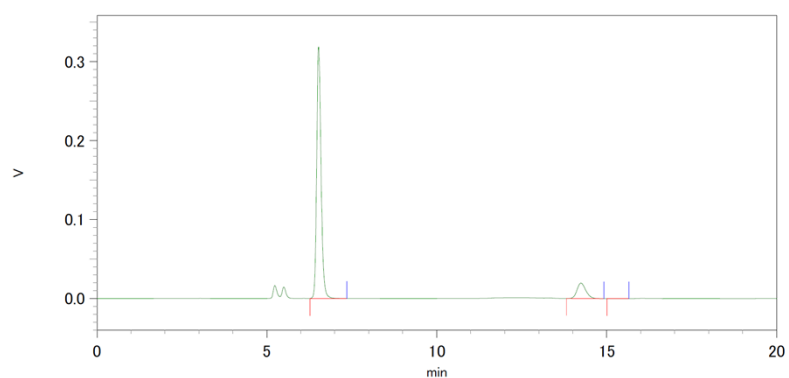

Detector A (254 nm)

| Retention time (min) | Area    | Area% | Height | Height% |
|----------------------|---------|-------|--------|---------|
| 6.517                | 2850396 | 89.02 | 318529 | 94.19   |
| 14.237               | 350936  | 10.96 | 19588  | 5.79    |
| 15.211               | 595     | 0.02  | 43     | 0.01    |

HPLC (YMC CHIRAL Amylose-C 250 x 4.6 mmI.D. S-5  $\mu$ m, 5%IPA/hexane, flow 1.0 mL/min, 254 nm, 40  $^{\circ}$ C):  $t_{R(S)}$  14.2 min,  $t_{R(R)}$  15.2 min.
